# Supplementary material for: Cryo-EM structure of human Pol κ bound to DNA and mono-ubiquitylated PCNA
Source: PubMed Central journal article supplement (PMC8526622; doi:10.1038/s41467-021-26251-6), 2021-10-19
Supplement: 41467_2021_26251_MOESM3_ESM.pdf [file 41467_2021_26251_MOESM3_ESM.pdf]

### **Description of Additional Supplementary Files**

File Name: Supplementary Movie 1

Description: Apo1 MD trajectory of Polk-PCNA complex. Colour code: Polk core in bright orange; Polk PAD in green; PAD C-terminus in red; PCNA in sky blue.

File Name: Supplementary Movie 2

Description: Apo1b MD trajectory of Polk-PCNA complex. Colour code: Polk core in bright orange; Polk PAD in green; PAD C-terminus in red; PCNA in sky blue.

File Name: Supplementary Movie 3

Description: Apo2 MD trajectory of Polk-PCNA complex. Colour code: Polk core in bright orange; Polk PAD in green; PAD C-terminus in red; PCNA in sky blue.

File Name: Supplementary Movie 4

Description: Apo2b MD trajectory of Polk-PCNA complex. Colour code: Polk core in bright orange; Polk PAD in green; PAD C-terminus in red; PCNA in sky blue.
